# Supplementary material for: Improvement of the weight update and retention characteristics of Pr0.7Ca0.3MnO3−x ECRAM via elevated temperature training
Source: Royal Society of Chemistry journal article supplement (doi:10.1039/d4nr03264k), 2024-12-14
Supplement: d4nr03264k1.pdf [file d4nr03264k1.pdf]

## Improvement of weight update and retention characteristics of $\text{Pr}_{0.7}\text{Ca}_{0.3}\text{MnO}_{3-x}$ ECRAM via elevated temperature training

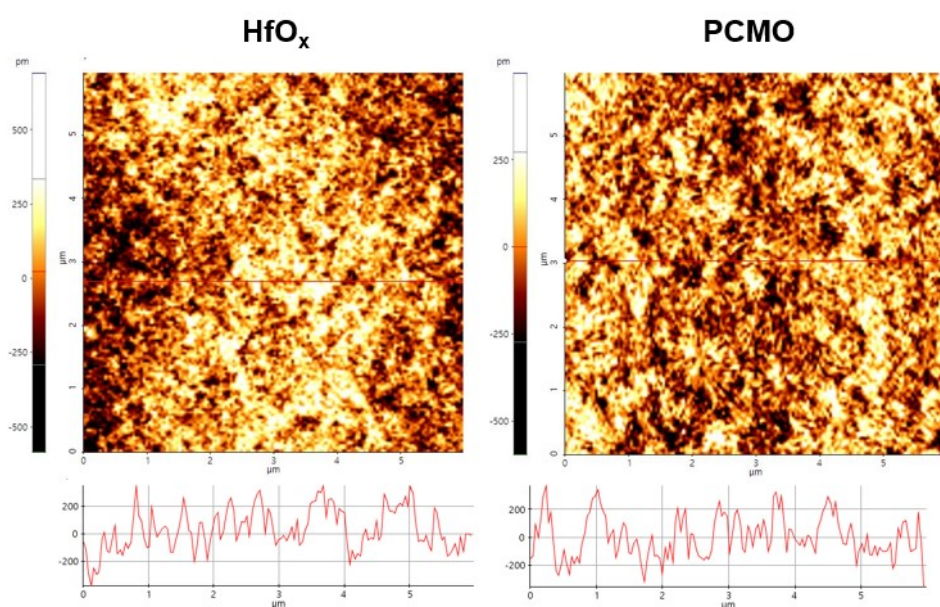

Fig.S1. AFM mapping on  $\text{HfO}_x$  electrolyte and PCMO channel surface.

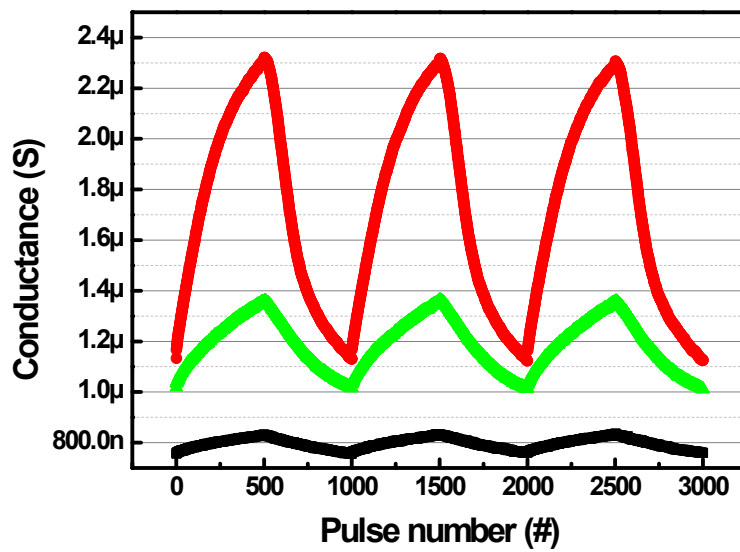

Fig.S2. Potentiation and depression characteristic according to ETs (373, 393 and 413 K)

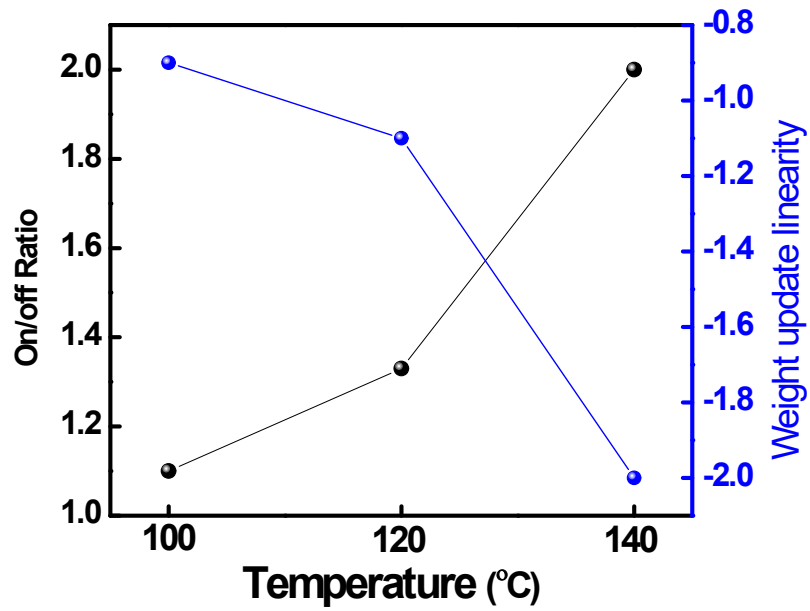

Fig.S3. On/off ratio and weight update linearity characteristics of PCMO ECRAM according to operating temperature.
